# Supplementary figures and images for: Fabrication and Preliminary In Vitro Evaluation of 3D-Printed Alginate Films with Cannabidiol (CBD) and Cannabigerol (CBG) Nanoparticles for Potential Wound-Healing Applications
Source: MDPI journal article supplement (doi:10.3390/pharmaceutics14081637), 2022-08-05

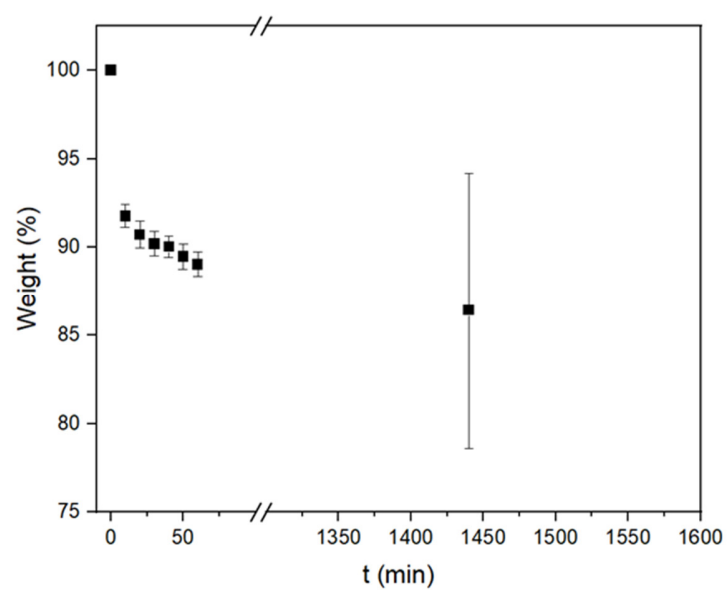

**Figure S1.** Variation of films' relative weight with time in PBS presence.

Supplement: s1 [file s1]
